# Supplementary material
Source: PubMed Central journal article supplement (PMC10172197)
Supplement: 41431_2022_1235_MOESM1_ESM.pdf [file 41431_2022_1235_MOESM1_ESM.pdf]

SUPPLEMENTARY INFORMATION

**Supplementary Table 1.** Clinical characteristics of the study population. Peripheral and total QRS score were calculated through the sum of Q, R, and S height, each taken as absolute value in mm (1 mm = 0.1 mV), in peripheral and total leads respectively.

| <b>Clinical Characteristics</b>                       |           |
|-------------------------------------------------------|-----------|
| Age at diagnosis (years)                              | 75±5      |
| Body surface area (m <sup>2</sup> )                   | 1.8±0.2   |
| Systolic blood pressure (mmHg)                        | 125±19    |
| Diastolic blood pressure (mmHg)                       | 72±13     |
| NTproBNP (pg/ml)                                      | 7193±9312 |
|                                                       |           |
| <b>Electrocardiography</b>                            |           |
| Heart rate (beats per minute)                         | 77±17     |
| Total QRS score (mm)                                  | 110±35    |
| Peripheral QRS score (mm)                             | 34±27     |
|                                                       |           |
| <b>Echocardiography</b>                               |           |
| Left ventricular end diastolic diameter (mm)          | 42±15     |
| Left ventricular end systolic diameter (mm)           | 31±18     |
| Interventricular septum thickness (mm)                | 16±5      |
| Posterior wall thickness (mm)                         | 15±5      |
| Interatrial septum thickness (mm)                     | 6±5       |
| Left atrial diameter (mm)                             | 47±4      |
| Left ventricular end diastolic volume (ml)            | 93±26     |
| Left ventricular end systolic volume (ml)             | 53±22     |
| Left ventricular ejection fraction                    | 43±15     |
| BSA Indexed left ventricular mass (g/m <sup>2</sup> ) | 211±40    |

**Supplementary Table 2.** Full sequences of all haplotypes represented in Figure 4, obtained including variants at all frequencies for finer dissection.

|       |                      |
|-------|----------------------|
| HAP1  | CCGCCGAAGCGGGAGCGATC |
| HAP2  | CCGCCGAGGCGGGGGCGACC |
| HAP3  | CCGCCGAAGCGGGGGCGACC |
| VAR1  | TCGCCGAAGCGGGGACGACC |
| HAP5  | TCGCCGAAGCGGGGGCAACC |
| HAP6  | CCGCCGAAGCGAGAGCGATC |
| HAP7  | CCGCCGGGGCGGGGGCGACC |
| HAP8  | CCGCCGAAGCGGGGGCGACA |
| HAP9  | TCGCCGAGCGGGGGCAACC  |
| HAP10 | CCGCCGAAACGGGGGCGATC |
| HAP11 | CCGCCGAAGCAGGAGCGATC |
| HAP12 | CCGCCGAAGCGGGAGTGATC |
| HAP13 | CCGTCGAGGCGGGGGCGACC |
| HAP14 | CCGCCGAAGCGGGGGCGATC |
| HAP15 | CCGCCGAAGCGGGGGCGACC |
| HAP16 | TCGCCGAAGCGGGGGCGACC |
| HAP17 | CCACCGAAGCGGGAGCGATC |
| HAP18 | CCGCCGAAACGGGGGCGATA |
| HAP19 | TCGCTGAAGCGGGGGCGACC |
| HAP20 | TCGCTGAAGCGGAAGCAACC |
| HAP21 | CCGCCGAAGCGGGAGCGCTC |
| HAP22 | CCGTCAAGGCGGGGGCGACC |
| HAP23 | CCGTCGAGGCGGGGGCGACA |
| HAP24 | CCGCCAAAGCGGGAGCGATC |
| HAP25 | CCGCCGAAGCGGGGGTGATC |
| HAP26 | CTGCCGGGGCGGGGGCGACC |
| VAR2  | TTGCCGAAGCGGGGACGACC |
| HAP28 | TCACTGGAGCGGGGGCAACC |
| HAP29 | CTGCCGAAACGGGGGCGATA |
| HAP30 | CCACCAAAGCGGGAGCGATC |
| HAP31 | CCGCCAAAGCAGGAGCGATC |
| HAP32 | CCATCGAGGCGGGGGCGACC |
| HAP33 | CCGCCGAAACGGGGGTGATC |

**Supplementary Table 3.** Details of all variants reported in the manuscript.

| Genomic_variant (hg19) | rsID        | Fig. 3 | Fig. 4 | Consequence (VEP v104)  | RefSeq_transcript_variant | HGVS_Predicted_Protein    |
|------------------------|-------------|--------|--------|-------------------------|---------------------------|---------------------------|
| 18-29165918-C-T        | rs17740847  | YES    | YES    | intergenic_variant      | –                         |                           |
| 18-29166726-C-T        | rs117748556 | NO     | YES    | upstream_gene_variant   | –                         | –                         |
| 18-29167669-G-A        | rs76431866  | NO     | YES    | upstream_gene_variant   | –                         | –                         |
| 18-29167905-A-G        | rs1667244   | YES    | NO     | upstream_gene_variant   | –                         | –                         |
| 18-29168029-C-T        | rs142696368 | NO     | YES    | upstream_gene_variant   | –                         | –                         |
| 18-29168467-C-T        | rs72922938  | NO     | YES    | upstream_gene_variant   | –                         | –                         |
| 18-29169387-G-A        | rs150555470 | NO     | YES    | upstream_gene_variant   | –                         | –                         |
| 18-29169825-A-G        | rs3764479   | YES    | NO     | upstream_gene_variant   | –                         | –                         |
| 18-29170483-G-T        | rs3764478   | YES    | NO     | upstream_gene_variant   | –                         | –                         |
| 18-29170617-A-G        | rs112278416 | YES    | YES    | upstream_gene_variant   | –                         | –                         |
| 18-29170698-A-G        | rs72922940  | YES    | YES    | upstream_gene_variant   | –                         | –                         |
| 18-29170709-G-A        | rs3764477   | NO     | YES    | upstream_gene_variant   | –                         | –                         |
| 18-29171033-C-T        | rs116409170 | NO     | YES    | upstream_gene_variant   | –                         | –                         |
| 18-29171123-A-T        | rs3794885   | YES    | NO     | upstream_gene_variant   | –                         | –                         |
| 18-29171184-G-A        | rs79748512  | NO     | YES    | upstream_gene_variant   | –                         | –                         |
| 18-29172476-G-T        | rs723744    | YES    | NO     | intron_variant          | NM_000371.3:c.70-383G>T   | NP_000362.1:p.?           |
| 18-29172865-G-A        | rs1800458   | YES    | YES    | missense_variant        | NM_000371.3:c.76G>A       | NP_000362.1:p.(Gly26Ser)  |
| 18-29173680-C-G        | rs1080093   | YES    | NO     | intron_variant          | NM_000371.3:c.200+691C>G  | NP_000362.1:p.?           |
| 18-29173784-G-A        | rs72922947  | NO     | YES    | intron_variant          | NM_000371.3:c.200+795G>A  | NP_000362.1:p.?           |
| 18-29173795-A-G        | rs1080094   | YES    | YES    | intron_variant          | NM_000371.3:c.200+806A>G  | NP_000362.1:p.?           |
| 18-29176460-C-A        | rs3764476   | YES    | NO     | intron_variant          | NM_000371.3:c.336+1242C>A | NP_000362.1:p.?           |
| 18-29176873-G-C        | rs7235277   | YES    | NO     | intron_variant          | NM_000371.3:c.336+1655G>C | NP_000362.1:p.?           |
| 18-29176971-T-G        | rs3794884   | YES    | NO     | intron_variant          | NM_000371.3:c.337-1560T>G | NP_000362.1:p.?           |
| 18-29178618-G-A        | rs76992529  | NO     | YES    | missense_variant        | NM_000371.3:c.424G>A      | NP_000362.1:p.(Val142Ile) |
| 18-29178899-C-T        | rs62093482  | NO     | YES    | 3_prime_UTR_variant     | NM_000371.3:c.*261C>T     | NP_000362.1:p.?           |
| 18-29179040-C-T        | rs1791228   | YES    | NO     | downstream_gene_variant | –                         | –                         |
| 18-29179228-G-A        | rs75032823  | YES    | YES    | downstream_gene_variant | –                         | –                         |
| 18-29181885-A-C        | rs117207032 | NO     | YES    | downstream_gene_variant | –                         | –                         |
| 18-29182352-T-G        | rs1791229   | YES    | NO     | downstream_gene_variant | –                         | –                         |
| 18-29183587-A-C        | rs4799583   | YES    | NO     | downstream_gene_variant | –                         | –                         |
| 18-29183812-T-C        | rs1473342   | YES    | YES    | downstream_gene_variant | –                         | –                         |
| 18-29184386-C-A        | rs144559530 | NO     | YES    | intergenic_variant      | –                         | –                         |
